# Supplementary material for: Fpr2−/− Mice Developed Exacerbated Alcohol-Associated Liver Disease
Source: MDPI journal article supplement (doi:10.3390/biology12050639), 2023-04-23
Supplement: s1 [file s1]

# *Fpr2*<sup>-/-</sup> mice developed exacerbated alcohol-associated liver disease

Josiah E. Hardesty<sup>1</sup>, Jeffrey B. Warner<sup>1,2</sup>, Ying L. Song<sup>1</sup>, Alison Floyd<sup>1</sup>, Craig J. McClain<sup>1,2,3,4,5</sup>, Dennis R. Warner<sup>1</sup> and Irina A. Kirpich<sup>1,2,4,5,6\*</sup>

**Supplemental Table S1:** Metabolic Characteristics of Experimental Mice

|                                       | WT PF<br>(n=8) | <i>Fpr2</i> <sup>-/-</sup> PF<br>(n=5) | WT EtOH<br>(n=10)         | <i>Fpr2</i> <sup>-/-</sup> EtOH<br>(n=8) |
|---------------------------------------|----------------|----------------------------------------|---------------------------|------------------------------------------|
| Initial BW, g                         | 21.83 ± 1.21   | 18.18 ± 0.48 <sup>a</sup>              | 18.05 ± 0.24 <sup>a</sup> | 18.39 ± 0.56                             |
| Final BW, g                           | 26.20 ± 1.53   | 21.60 ± 0.77 <sup>a</sup>              | 22.85 ± 0.44 <sup>a</sup> | 22.89 ± 0.83                             |
| Liver/BW, %                           | 3.50 ± 0.15    | 3.99 ± 0.11 <sup>a</sup>               | 4.29 ± 0.07 <sup>a</sup>  | 3.66 ± 0.17 <sup>c</sup>                 |
| WAT/BW, %                             | 2.32 ± 0.43    | 1.49 ± 0.24                            | 2.16 ± 0.2                | 2.64 ± 0.25 <sup>b</sup>                 |
| Food Consumption,<br>mL/day per mouse | *              | *                                      | 13.63 ± 0.32              | 13.14 ± 0.50                             |

**Abbreviations:** BW: body weight, WAT: white adipose tissue. \* denotes that PF mice consumed the same amount of diet as their EtOH-fed counterparts. Statistical significance and comparison are denoted by the following letters: <sup>a</sup>: *vs* WT PF, <sup>b</sup>: *vs Fpr2*<sup>-/-</sup> PF; <sup>c</sup>: *vs* WT EtOH. One-way ANOVA, *p* < 0.05.

**Supplemental Table S2:** qPCR Primers

| Gene         | Forward Primer Sequence | Reverse Primer Sequence |
|--------------|-------------------------|-------------------------|
| <i>18s</i>   | CTCAACACGGGAAACCTCAC    | CGCTCCACCAACTAAGAACG    |
| <i>Pcna</i>  | TGTGCCCTTGTGTAGAGT      | AAAGACCTCAGGACACGCTG    |
| <i>Ki67</i>  | TCACCTGGTCACCATCAAGC    | TCAATACTCCTTCCAAACAGGCA |
| <i>Cd163</i> | GTGCTGGATCTCCTGGTTGT    | CGTTAGTGACAGCAGAGGCA    |
| <i>Mertk</i> | GCGAGTTTGGGACGTTGGTG    | ACTTCTCGGCAGTGCTCC      |
| <i>Mrc1</i>  | AGGGACCTGGATGGATGACA    | AGGGAAGGGTCAGTCTGTGT    |
| <i>Fpr2</i>  | CACAGGAACCGAAGAGTGTAAG  | CACCATTGAGAGGATCCACAG   |

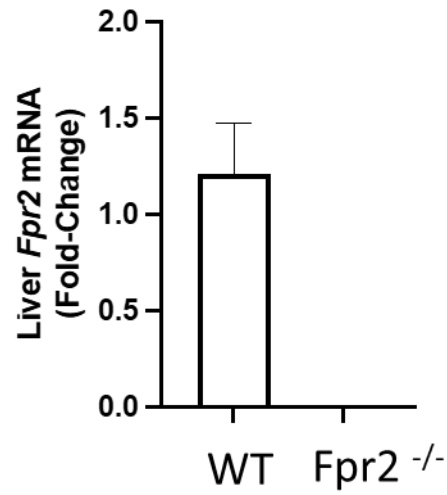

**Supplemental Figure S1.** Liver *Fpr2* mRNA expression in WT and *Fpr2*<sup>-/-</sup> mice. Data are presented as mean ± SEM.

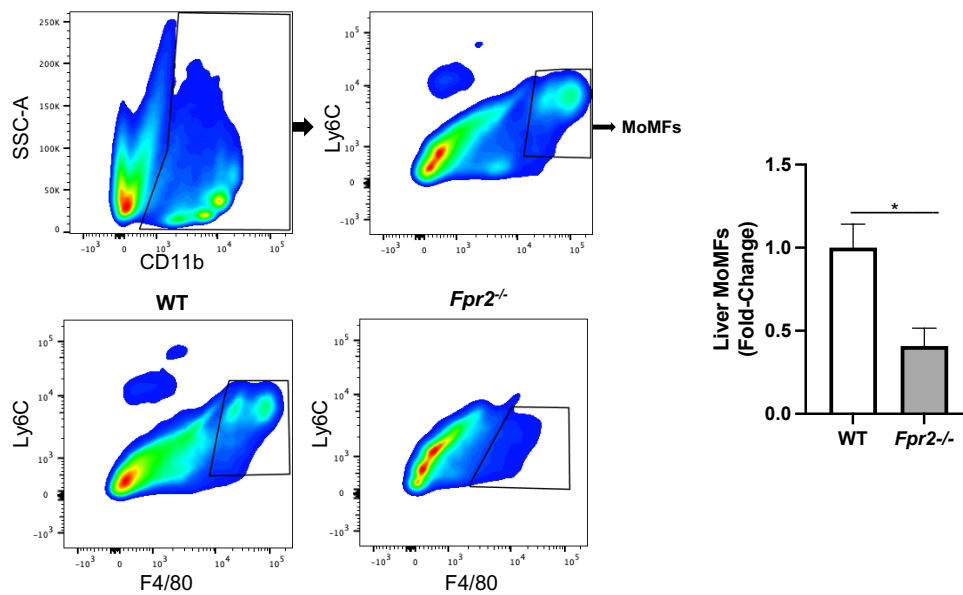

**Supplemental Figure S2.** Gating strategy to measure hepatic MoMFs and the associated quantification in WT and *Fpr2*<sup>-/-</sup> mice. Data are presented as mean ± SEM. The data were acquired from independent experiments using 3 individual mice from each genotype.
